# Supplementary material
Source: PubMed Central journal article supplement (PMC2917707)
Supplement: mmc1.pdf [file mmc1.pdf]

## Supplemental Data

### Fine-Scale Survey of X Chromosome

### Copy Number Variants and Indels

### Underlying Intellectual Disability

Annabel C. Whibley, Vincent Plagnol, Patrick S. Tarpey, Fatima Abidi, Tod Fullston, Maja K. Choma, Catherine A. Boucher, Lorraine Shepherd, Lionel Willatt, Georgina Parkin, Raffaella Smith, P. Andrew Futreal, Marie Shaw, Jackie Boyle, Andrea Licata, Cindy Skinner, Roger E. Stevenson, Gillian Turner, Michael Field, Anna Hackett, Charles E. Schwartz, Jozef Gecz, Michael R. Stratton, and F. Lucy Raymond

Figure S1: Sample level QC

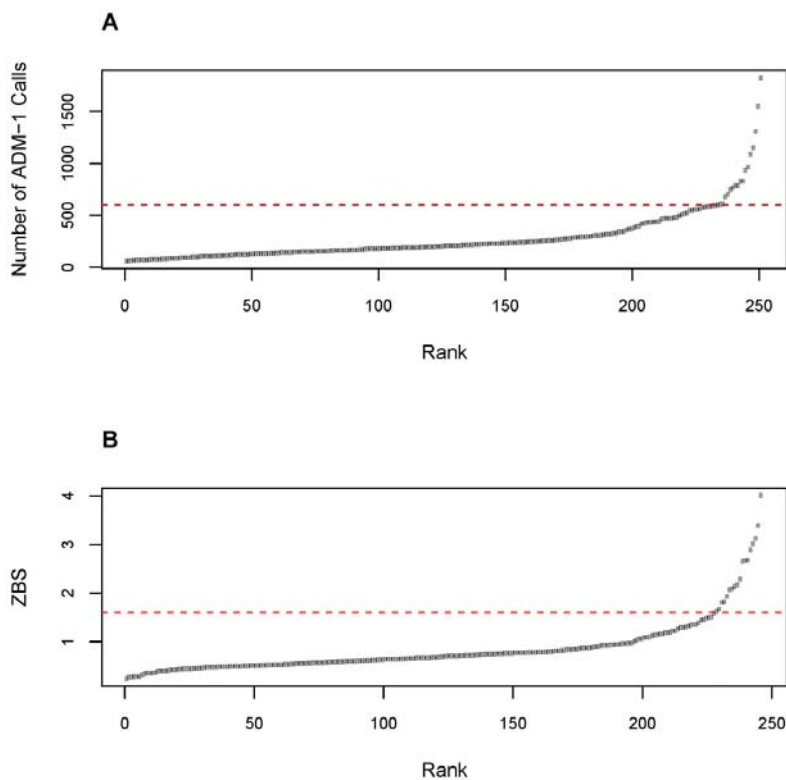

Plots of sample rank against QC indices. Two measures of sample performance were used for QC: (A) Total ADM-1 call number and (B) a z-score based statistic (ZBS). Dashed red lines indicate thresholds above which samples were excluded from high-resolution analysis (total call number >600 and ZBS>1.6). The ZBS was calculated by i) estimating the mean and standard error of the intensity distribution for each probe across the sample population; ii) using these estimates to compute, for each pair of probe and individual, a normalized z-score; iii) to obtain a unique summary statistic per sample we summarized the z-score values across all probes by computing the ratio of the 90% quantile of the squared z-score distribution divided by its theoretical value (90% of a chi-squared distribution on one degree of freedom: 2.7). Female samples were excluded from ZBS analysis.

**Figure S2:** CNV level QC by outlier analysis

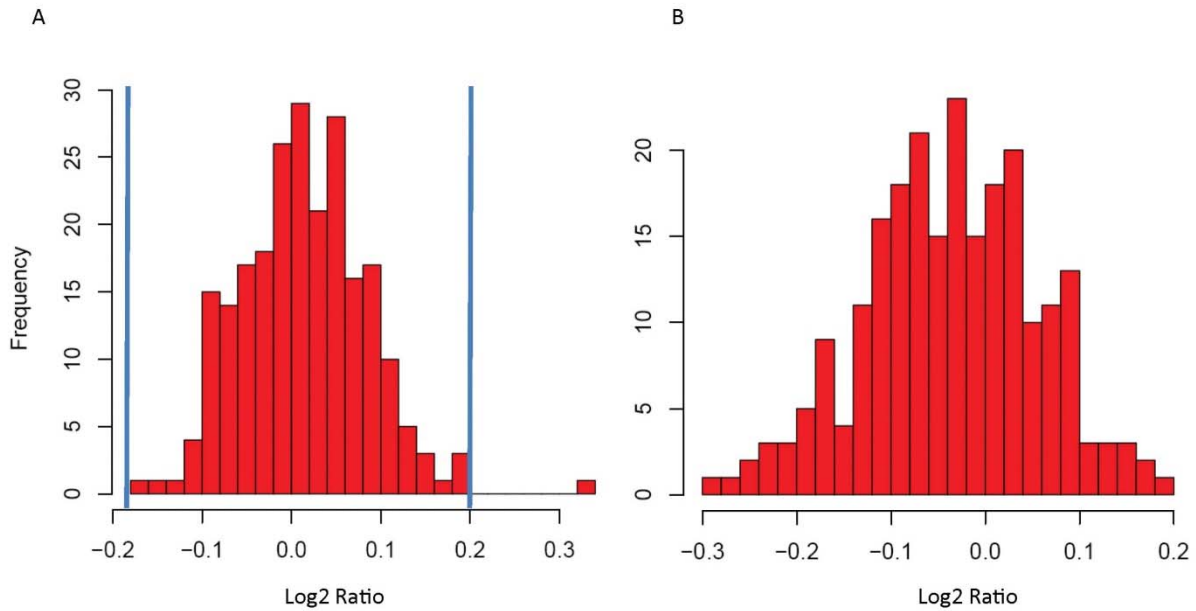

Representative (A) good quality call and (B) rejected call, each supported by 24 probes. CNV-level QC was based on evaluation of the performance of the probes reporting the CNV within the context of the sample population as a whole, after the exclusion of poor-performing samples. For each merged CNV call, histograms of log2 ratio were subjected to automated outlier calling and manual curation, including the review of all large CNVs (>50kb) to assess the probe-level evidence for complex rearrangements. A rare CNV call was considered valid if the average log2 ratio was discrete from the distribution of the main population.

**Figure S3: CNV workflow**

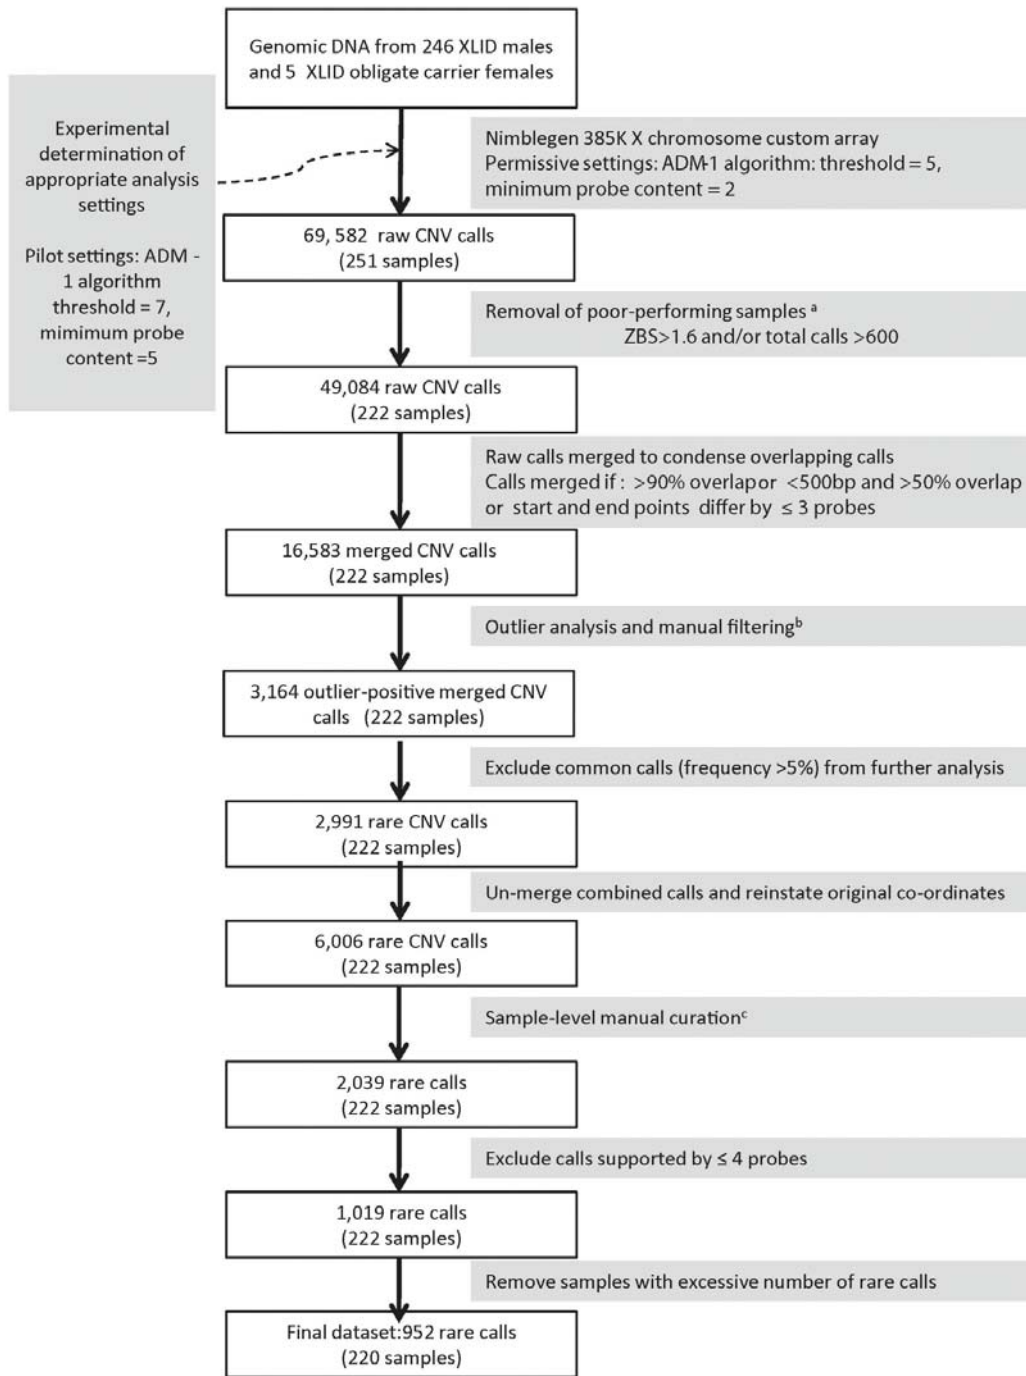

<sup>a</sup> as described in Supplementary Figure 1; <sup>b</sup> as described in Supplementary Figure 2; <sup>c</sup> Overlapping ADM-1 calls within the same sample were condensed. Since outlier analysis was based on mean log<sub>2</sub> values but the mean log<sub>2</sub> value can be influenced by the contribution of a small number of anomalous probes with extreme log<sub>2</sub> values, we ranked the log<sub>2</sub> ratio of each probe contained within the CNV and computed the median rank for each sample to identify and exclude low-confidence calls. Only calls supported by an average median rank in the upper or lower 20% of the population were retained.

**Figure S4:** Pedigrees of XLID families with likely pathogenic copy number variants

For each family, the individual analyzed by aCGH is indicated by an arrow. (A) Family 57 *MECP2* duplication; (B) Family 340 *MECP2* duplication; (C) Family 344 *MECP2* duplication; (D) Family 389 *MECP2* duplication; (E) Family 495 *MECP2* duplication; (F) Family 509 *MECP2* duplication; (G) Family 538 *HUWE1* duplication; (H) Family 376 Xp22.13-Xp22.11 duplication; (I) Family 505 *ARX* duplication; (J) Family 110 *AFF2* duplication; (K) Family 32 *IL1RAPL1* deletion; (L) Family 398 *SLC16A2* deletion; (M) Family 399 *SLC16A2* deletion; (N) Family 115 *SLC9A6* deletion; (O) Family 147 *MAOA* and *MAOB* deletion.

Figure S4: Continued

A Family 57

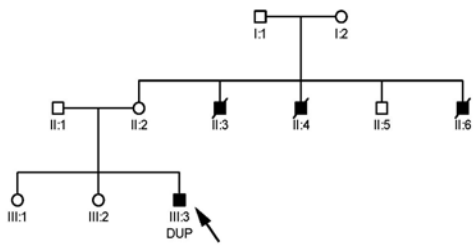

B Family 340

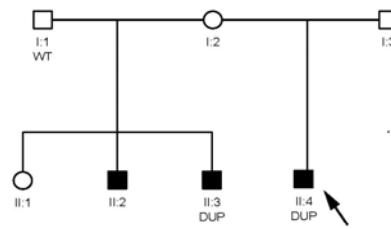

C Family 344

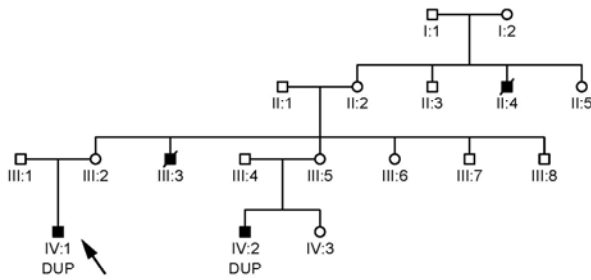

D Family 389

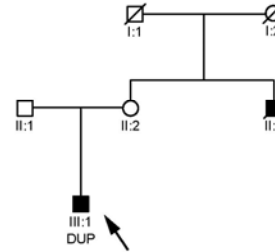

E Family 495

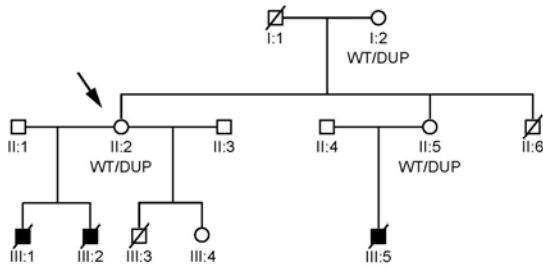

F Family 509

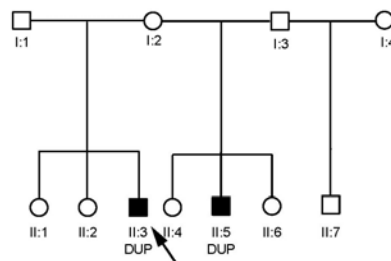

Figure S4: Continued

G Family 538

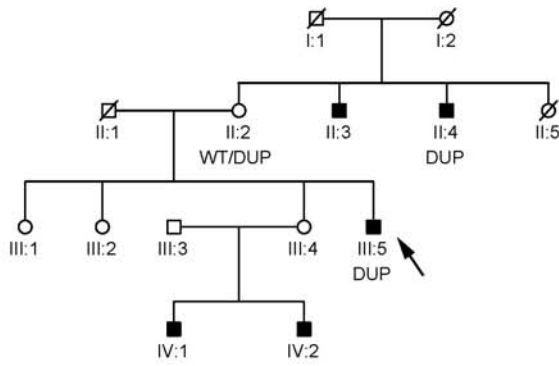

H Family 376

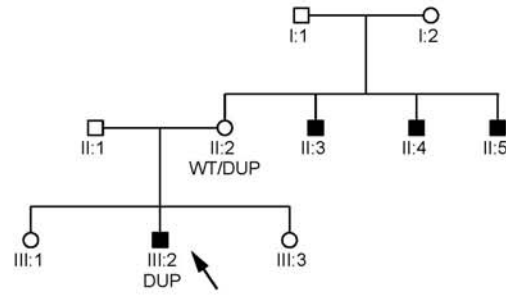

I Family 505

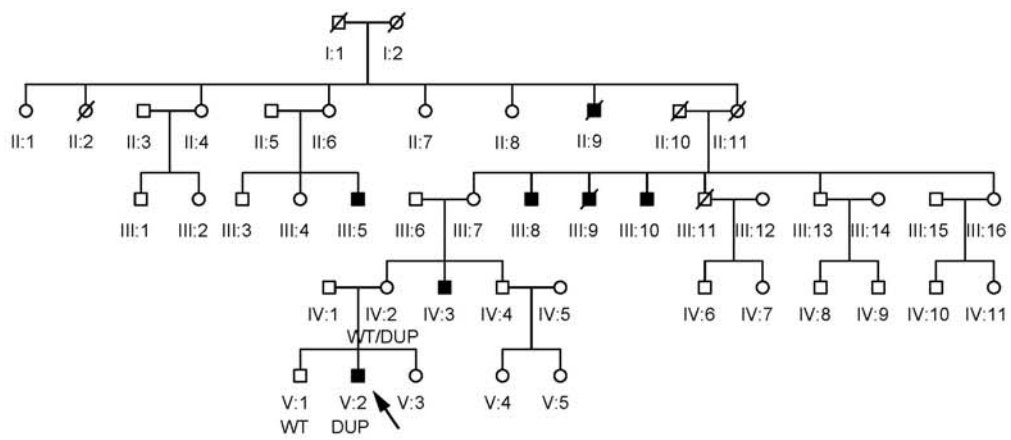

J Family 110

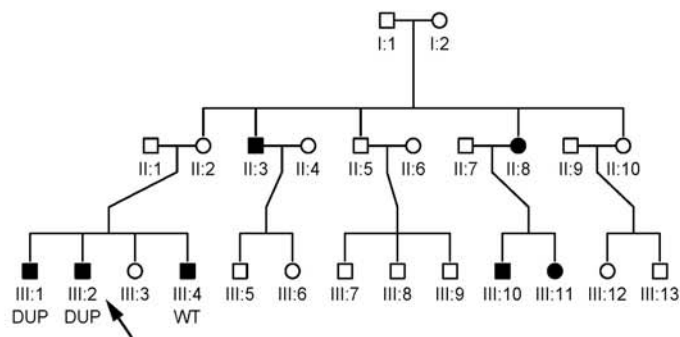

Figure S4: Continued

K Family 32

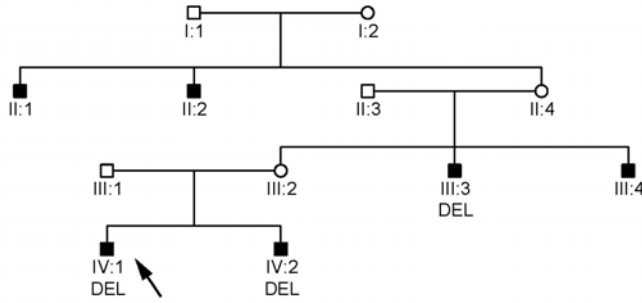

L Family 398

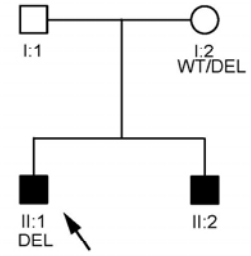

M Family 399

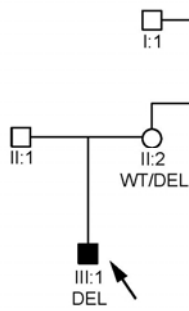

N Family 115

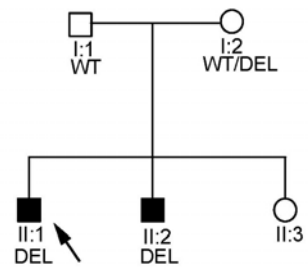

O Family 147

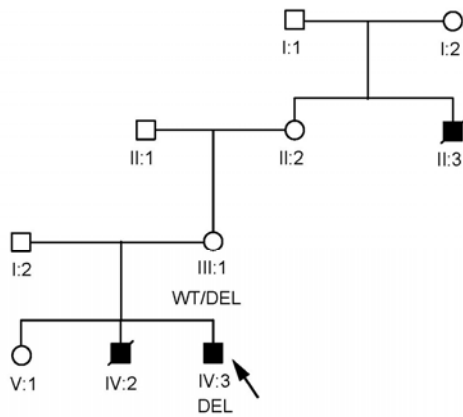

**Figure S5:** Pedigrees and segregation data for families with CNVs of unknown significance or without disease association

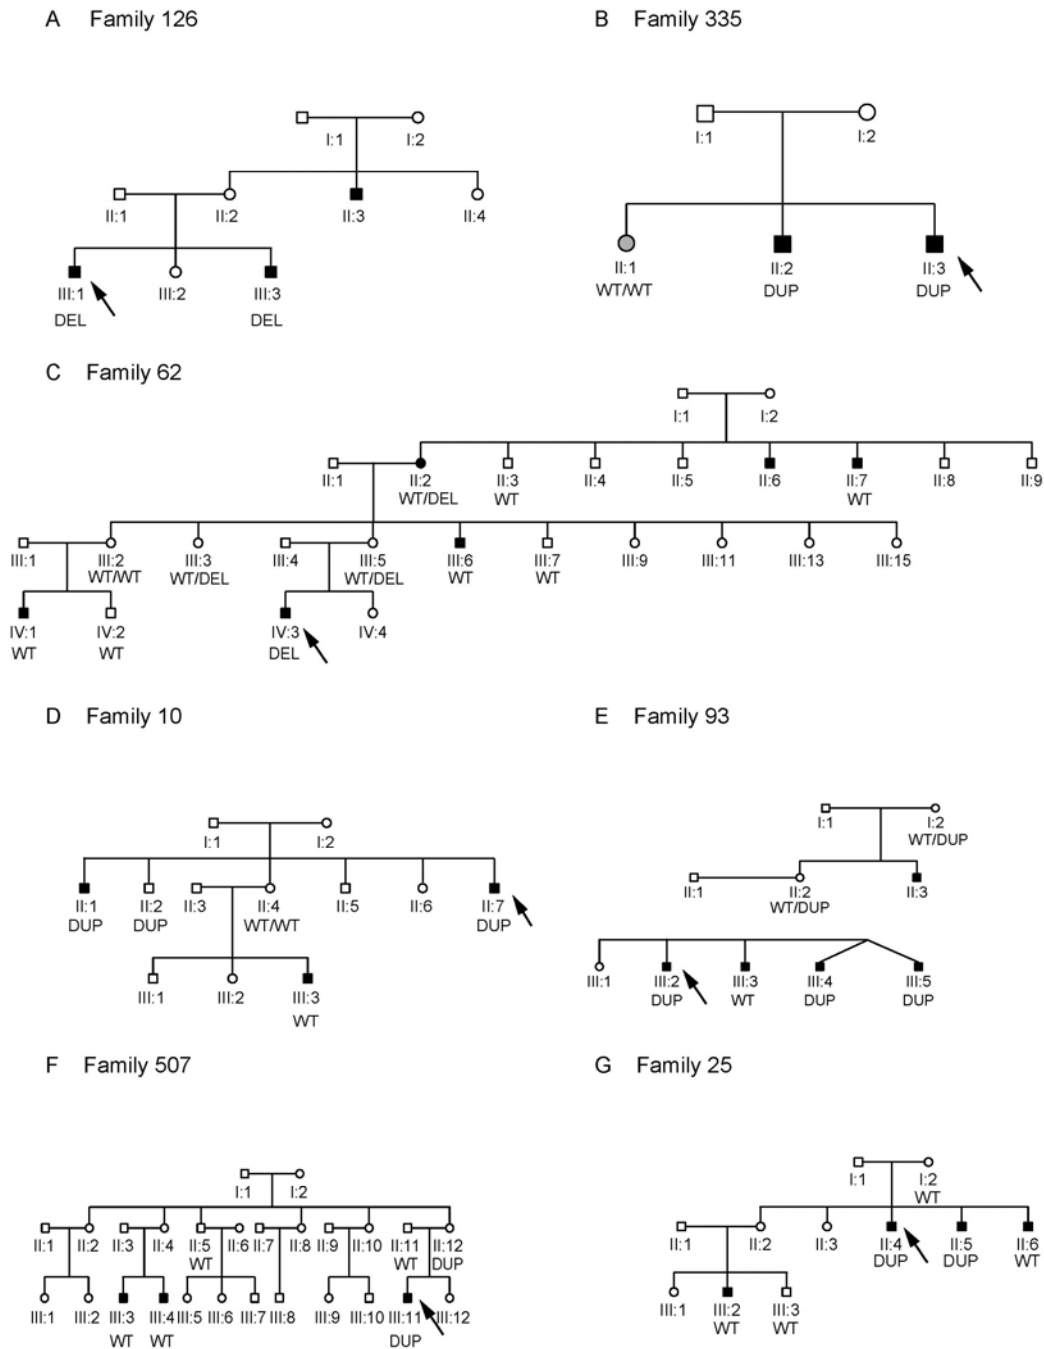

For each family, the individual analyzed by aCGH is indicated by an arrow. (A) Family 126 *NLGN4X* non-coding deletion; (B) Family 335 *PCDH11X* non-coding deletion. Grey shading indicates mildly affected female; (C) Family 62 *AWAT1* deletion; (D) Family 10 *IDS* duplication; (E) Family 93 both duplication calls (containing *XIAP* and *STAG2*) co-segregate; (F) Family 507 Xp22.33 duplication; (G) Family 25 Xp22.33 duplication.



**Figure S6:** Cohort comparisons

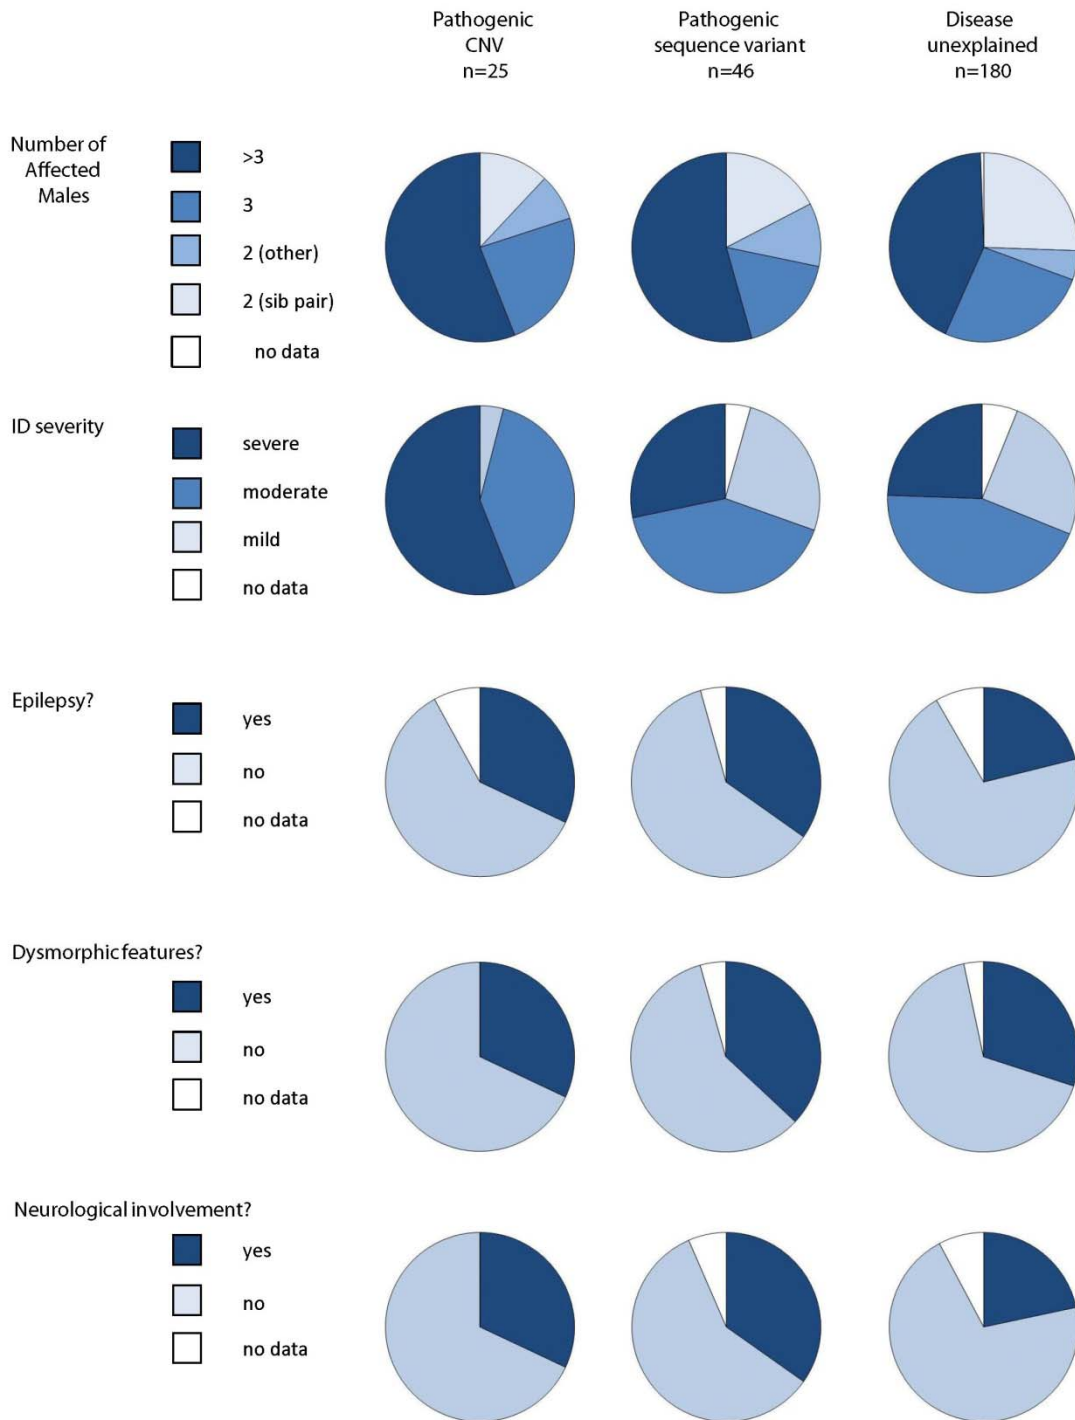

Pie charts showing pedigree features and clinical characteristics of IGOLD cohort families subdivided according to whether disease can be attributed to a pathogenic CNV, sequence variant or remains unexplained.

**Figure S7:** Sequence alignments of deletion and duplication breakpoint junctions

For each sequenced breakpoint, junction fragment sequence (JF) is aligned to proximal (A) and distal (B) reference sequence matches, shown in blue and orange. Short stretches of microhomology at the breakpoint, which could be derived from either proximal or distal sequence, are in bold underlined black type. Inserted sequence found at the breakpoint in family 206 is indicated in green and likely results from a serial replication slippage event.

**A) FAMILY 110 (DUPLICATION)**

```
110_A  GTCACTACAGAGGCTATGTAATACTCCAAGTTCCAAAGACAAAGGGATTTCCAGTACTTCCTCAAGGCCATCTCTCATA
JF     GTCACTACAGAGGCTATGTAATACTCCAAGTTCCAAAGACTTAATTATGTGCTGATTGTTGAATGGTGAACTTCTTGAGG
110_B  GGAAGGTAGAGTGCTTACTCTGGCGACCTGGACTGGACTACTATAATTATGTGCTGATTGTTGAATGGTGAACTTCTTGAGG
```

**B) FAMILY 121 (DELETION)**

```
121_A  TAGTAGAGGACTTTTTTCTTTCTTAAAGCAAATTATATGCCTCAGCAGTACTTATTTTACAAAATGCAGAAGACTGTA
JF     TAGTAGAGGACTTTTTTCTTTCTTAAAGCAAATTATATGCCAGATCTCACATGAACTGAGAGTGAGGACTCATTCAATTAT
121_B  GAGGGAGAAAGAGTGGGGAGGTGCCACAGTTTTTAAACAACCAGATCTCACATGAACTGAGAGTGAGGACTCATTCAATTAT
```

**C) FAMILY 147 (DELETION)**

```
147_A  AGCCTCCCGAGTAGCTGGGACTACAGGTGCCACCACCATGCCAGCTAATTTTTTGATTTTTTAGTAGAGATGGGGTTT
JF     AGCCTCCCGAGTAGCTGGGACTACAGGTGCCACCACCATAGCAGCATGATTTATAATCCTTTGGGTATACACCAGTAA
147_B  AACAGTGCTGCAATAACCATACGTGTGCATGTGTCTTTATAGCAGCATGATTTATAATCCTTTGGGTATACACCAGTAA
```

**D) FAMILY 206 (DELETION)**

```
206_A  AGGGACCAGCCAGTCGCATCAACAGCAGCCCCACTGTGGTCAGACTCAAGGAGGGCCTGGCTGGAAGCAGGATGATGGTC
JF     AGGGACCAGCCAGTCGCATCAACAGCAGCCCCACTGTGGTCTCAAACCTCCCCAAGCCATGCTAGGACCTCACACCTCGG
                                     ↑
                                     CTCAAACCTCCC
206_B  CAAAACAGCCAGGTGACCTCCCATCTAGGGATGGGGCCCCCTCAAACCTCCCCAAGCCATGCTAGGACCTCACACCTCGG
```

### E) FAMILY 317 (DUPLICATION)

317\_A CAATGTGAATGGCATCATCTAATCAGCTGAAGGCCTAGATAGAATCAAAGATAAAGGAAAAAGCAAACCTCTCTCTCTCT  
JF CAATGTGAATGGCATCATCTAATCAGCTGAAGGCCTAGATACTGGAACAGCCTTATGCAATGGCAGGGTTAACTTTGTG  
317\_B CTGCTGGGTTCTGTTTGGGTCTCTTCTCCTTGTGCTGCATACTGGAACAGCCTTATGCAATGGCAGGGTTAACTTTGTG

### F) FAMILY 398 (DELETION)

398\_A GATTACAGGCGTGAGCCACCACACCCGGCAACTCCATTTCTTTCTGTAGGATTTATGTAAACATTGATTCACGCATTA  
JF GATTACAGGCGTGAGCCACCACACCCGGCAACTCCATTTCTTTTGGGAAGGGGAAGCCATCCCAGCCTTTACCACCCAAT  
398\_B AAGGTACAGGCAGCAGTTGCACATAGGGTTGGAAAATTTCTTTTGGGAAGGGGAAGCCATCCCAGCCTTTACCACCCAAT

### G) FAMILY 399 (DELETION)

399\_A AAAGTTTCTGGAGAACTTTAGAGAAATTTTACTGGTCTTTCAGATTGAAATTTGGGAAGCATTGTTTGGTTTTCTG  
JF AAAGTTTCTGGAGAACTTTAGAGAAATTTTACTGGTCTTTGGAGATTTCTCAAAGAATTTAAACAGAACTACCGTTTGA  
399\_B TGGGATTACAGGCGTGTGCCACTGCACCCAGTCTCAGTTTGGAGATTTCTCAAAGAATTTAAACAGAACTACCGTTTGA

### H) FAMILY 463 (DUPLICATION)

463\_A ATAACCAAATCAGCAAGGGAAAGGGAAAAGAAAAGAAGAACTGCTAAATGAACATGCCATGTATCAGAACAAACAGAA  
JF ATAACCAAATCAGCAAGGGAAAGGGAAAAGAAAAGAAGAAAATTACAAGAAAAATAAAACGCTACAGCCGAATAAAAGA  
463\_B GGTATGTCAACATTAGGTAAAGAGGACTTCATCGCAACGAAAAATTACAAGAAAAATAAAACGCTACAGCCGAATAAAAGA

### I) FAMILY 505 (DUPLICATION)

505\_A GGGTTAGATAGCGGGTTATAACGGATATTATTGCGATCTTTTGTCCTTTCTGCCTCCCTTGGTTGCCGGCTGCCGGCTCC  
JF GGGTTAGATAGCGGGTTATAACGGATATTATTGCGATCTTGTATCCCAGAACTTAAAAAGAAAACAAAGAAACCCTAAT  
505\_B ACATGTGTACCTATGTAACAAACCTGCACGTTCTGCACATGTATCCCAGAACTTAAAAAGAAAACAAAGAAACCCTAAT

### J) FAMILY 506 (DELETION)

506\_A AAGGGGGGGCTACACCGGGGAATGGGAGGGTTGGGAAGCGGATAGGCTGACACCAGGAGTGAGCAGAACGAGGGGG  
JF AAGGGGGGGCTACACCGGGGAATGGGAGGGTTGGGAATTTTGTGTTTTTAGTAGAGACGGGGTTTCTCCATGTTGGC  
506\_B GTAGCTGGGATTACAGGCATGCAGCACCCAGCCTGGCTAATTTTTGTGTTTTTAGTAGAGACGGGGTTTCTCCATGTTGGC

### K) FAMILY 540 (DELETION)

540\_A AATTTCTCTACTGGTTTGTACTTGTGGAAGATAAGCATGTGTCCCTGAACATTTATTATATGTTATACGTCCTGTAGATCT

JF AATTTCTCTACTGGTTTGTACTTGTGGAAGATAAGCATGTGCCCGGCAAGGGCTTTGTTTCATTAGGATCAACAAGGTGCT

540\_B GGCCTCCCAAAGTGCTGGGATTACAGGCGTGAGCCACCGTGCCCGGCAAGGGCTTTGTTTCATTAGGATCAACAAAGTGCT

### L) FAMILY 126 (DELETION)

126\_A AGGAATTAAAGACACACAGAAATATAGAGGTGTGGAGTGGGAAATCAGGGGTCTCACAGCCTCAGAGGTGAGAGCCTCA

JF AGGAATTAAAGACACACAGAAATATAGAGGTGTGGAGTGGAAAACAACAAAATCTCTAATACCCTATGTACTGCATTTAC

126\_B AGCCTGGGTTGATAGAGCAAGACCCAGTCTCTAAAAAATAAAACAACAAAATCTCTAATACCCTATGTACTGCATTTAC

**Table S1:** Pathogenic CNVs identified in parallel analyses of the IGOLD families

| <b>Family</b> | <b>Mutation</b>                              | <b>Mode of Identification</b> | <b>Reference</b>                          |
|---------------|----------------------------------------------|-------------------------------|-------------------------------------------|
| 77            | <i>HSD17B10</i> and <i>HUWE1</i> duplication | BAC Array                     | <sup>1</sup>                              |
| 121           | <i>IL1RAPL1</i> intragenic deletion          | BAC Array                     | G.Froyen, unpublished data                |
| 164           | <i>MECP2</i> duplication                     | MLPA                          | <sup>2; 3</sup>                           |
| 185           | <i>MECP2</i> duplication                     | MLPA                          | <sup>2; 3</sup>                           |
| 241           | <i>MECP2</i> duplication                     | MLPA                          | unpublished data                          |
| 304           | <i>HSD17B10</i> and <i>HUWE1</i> duplication | BAC Array                     | <sup>1</sup>                              |
| 317           | Xq24-Xq25 duplication                        | BAC Array                     | G.Froyen, unpublished data                |
| 340           | <i>MECP2</i> duplication                     | MLPA                          | <sup>4</sup>                              |
| 359           | <i>HSD17B10</i> and <i>HUWE1</i> duplication | BAC Array                     | <sup>1</sup>                              |
| 422           | Xq13.1-q21.1 duplication                     | BAC Array                     | <sup>5</sup> , G.Froyen, unpublished data |
| 495           | <i>MECP2</i> duplication                     | MLPA                          | <sup>4</sup>                              |
| 509           | <i>MECP2</i> duplication                     | MLPA                          | unpublished data                          |

MLPA: multiplex ligation-dependent probe amplification; BAC: Bacterial artificial chromosome.

**Table S2:** Clinical summary of IGOLD cohort

|                                            | No.<br>families<br>(n=251) | %     |
|--------------------------------------------|----------------------------|-------|
| <b>No. affected males</b>                  |                            |       |
| 2 (sib pair)                               | 57                         | 22.7% |
| 2 (other)                                  | 17                         | 6.8%  |
| 3                                          | 61                         | 24.3% |
| >3                                         | 116                        | 46.2% |
| <b>Ancestry</b>                            |                            |       |
| European                                   | 228                        | 90.8% |
| Black African                              | 4                          | 1.6%  |
| Asian                                      | 5                          | 2.0%  |
| European/Aboriginal                        | 1                          | 0.4%  |
| European/Asian                             | 1                          | 0.4%  |
| Hispanic                                   | 1                          | 0.4%  |
| No data                                    | 11                         | 4.4%  |
| <b>Severity of intellectual disability</b> |                            |       |
| Severe (IQ 20-34)                          | 71                         | 28.3% |
| Moderate (IQ 35-49)                        | 109                        | 43.4% |
| Mild (IQ 50-69)                            | 58                         | 23.1% |
| No data                                    | 13                         | 5.2%  |
| <b>Head circumference</b>                  |                            |       |
| Macrocephaly                               | 34                         | 13.5% |
| Microcephaly                               | 31                         | 12.4% |
| Normal                                     | 162                        | 64.5% |
| No data                                    | 24                         | 9.6%  |
| <b>Epilepsy</b>                            |                            |       |
| Yes                                        | 62                         | 24.7% |
| No                                         | 170                        | 67.7% |
| No data                                    | 19                         | 7.6%  |
| <b>Speech and language</b>                 |                            |       |
| Absent                                     | 32                         | 12.7% |
| Delayed                                    | 206                        | 82.1% |
| Normal                                     | 2                          | 0.8%  |
| No data                                    | 11                         | 4.4%  |
| <b>Dysmorphic features</b>                 |                            |       |
| Yes                                        | 79                         | 31.5% |
| No                                         | 164                        | 65.3% |
| No data                                    | 8                          | 3.2%  |
| <b>Neurological features</b>               |                            |       |
| Yes                                        | 63                         | 25.1% |
| No                                         | 171                        | 68.1% |
| No data                                    | 17                         | 6.8%  |

**Table S3:** Array design and probe allocation

| Design                 | Feature                           | Number of Probes | Mean Probe Spacing (bp) | Median Probe spacing (bp) |
|------------------------|-----------------------------------|------------------|-------------------------|---------------------------|
| <b>Targeted Design</b> | Coding Sequences (742 genes )     | 103 481          | 59                      | 36                        |
|                        | Ultra Conserved Elements (n=27)   |                  |                         |                           |
|                        | Highly Conserved Elements (n=181) |                  |                         |                           |
|                        | Autosomal Sub-Telomeres           | 8 074            | Nd                      | nd                        |
| <b>Backbone Design</b> | X chromosome                      | 271 126          | 506                     | 463                       |
|                        | Random X chromosome               | 2 119            | 756                     | 476                       |

The X chromosome design comprised two parts: targeted high-density coverage of regions of interest and a genomic backbone covering all 155Mb of the X chromosome. In addition to the coding sequences of Vega-annotated genes, we targeted the X chromosome members of the ultra conserved elements identified by Bejerano et al <sup>6</sup> and 181 X chromosome members of the top 5000 highly conserved elements defined by Siepel et al <sup>7</sup>. Probes for autosomal sub-telomeres were also included, with no imbalances detected. The probe spacing of the targeted design was calculated by dividing the target size by the number of probes contained within it. The probe spacing of the backbone design was calculated from the lengths of uninterrogated sequences between adjacent backbone probes, with the centromere excluded. A maximum of two unique matches per oligonucleotide was permitted in order to effectively cover pseudoautosomal and other X-Y homologous regions. nd= not determined.

**Table S4:** Experimental validation of analysis settings

| Deletion | Call extent         | Number of Probes | Gene content              | Pilot Analysis Settings |    |    | Permissive Analysis Settings |    |    |
|----------|---------------------|------------------|---------------------------|-------------------------|----|----|------------------------------|----|----|
|          |                     |                  |                           | Number of calls         | FN | FP | Number of calls              | FN | FP |
| Vdel_1   | 19376389-19378670   | 2-8              | <i>MAP3K15</i> (intronic) | 5                       | 10 | 0  | 14                           | 1  | 0  |
| Vdel_2   | 33952795-33980684   | 53-57            | Intergenic                | 3                       | 2  | 0  | 5                            | 0  | 0  |
| Vdel_3   | 69648049-69650096   | 3-7              | Intergenic                | 3                       | 9  | 0  | 12                           | 0  | 0  |
| Vdel_4   | 131766775-131769279 | 4-8              | <i>HS6ST2</i> (intronic)  | 7                       | 12 | 2  | 14                           | 5  | 2  |
| Vdel_5   | 134634881-134636316 | 12-18            | Intergenic                | 4                       | 2  | 0  | 5                            | 1  | 0  |
| Vdel_6   | 143435664-143445262 | 5-30             | Intergenic                | 15                      | 6  | 0  | 20                           | 1  | 0  |
| Vdel_7   | 153283848-153284100 | 3-10             | <i>DNS1L1</i> (3'UTR)     | 6                       | 2  | 0  | 9                            | 0  | 1  |
| Vdel_8   | 154044709-154057314 | 23               | Intergenic                | 4                       | 1  | 0  | 4                            | 1  | 0  |
| TOTAL    |                     |                  |                           | 47                      | 44 | 2  | 83                           | 9  | 3  |

Analysis thresholds were evaluated by PCR validation of a sample of 8 small polymorphic deletions which had been identified in the analysis. FN = number of false negative calls, FP= number of false positive calls. The pilot settings were ADM-1 threshold = 7, minimum probe content = 5. By reducing the analysis stringency to the permissive settings (ADM-1 threshold = 5, minimum probe content = 2), the calling of the polymorphic deletions was improved: the false negative rate was reduced to 10% (9/89 calls) at permissive settings, compared to 49% (44/89 calls) with pilot settings. There was minimal impact on false positive calls: using pilot settings, false positive rate was 4.2% (2/47 calls) and 3.6% (3/83 calls) using permissive settings. The detection efficiency varied considerably between loci and fell close to the detection limit of the array in terms of probe content and/or size.



**Table S5:** Experimentally verified CNVs in QC fail samples

| Family              | Type | Genes                                                                                                            | Genomic Co-ordinates        | Extent (kb) |
|---------------------|------|------------------------------------------------------------------------------------------------------------------|-----------------------------|-------------|
| 495 (female sample) | Dup  | Several, including <i>MECP2</i>                                                                                  | 152,463,832-154,426,868 (M) | 1,963       |
| 463                 | Dup  | <i>GSPT2</i>                                                                                                     | 51,469,871-51,509,041 (S)   | 39          |
| 717                 | Dup  | Several, including <i>VCX</i> , <i>VCX2</i> , <i>VCX3A</i> and <i>STS</i>                                        | 6,458,251-8,098,324 (E)     | 1,640       |
| 422                 | Dup  | Several, including <i>MED12</i> , <i>NLGN3</i> , <i>SLC16A2</i> , <i>KIAA2022</i> , <i>ATRX</i> and <i>BRWD3</i> | 70,134,868-81,653,582 (E)   | 11,519      |
| 350 (female sample) | Dup  | Several, including <i>ZNF630</i>                                                                                 | 47,747,299-47,887,027 (E)   | 140         |
| 763                 | Del  | Several, including <i>ZNF630</i>                                                                                 | 47, 882,521-47,748,841 (E)  | 134         |

Letters in parentheses after genomic co-ordinates specify whether CNV bounds are ADM-1 estimates (E) or have been adjusted after breakpoint sequencing (S) or qPCR and manual inspection of probe log<sub>2</sub> ratios (M).

**Table S6:** Rare CNVs and indels identified in the IGOLD cohort using high resolution analysis

Abbreviations

N probes: Number of probes reporting CNV call. Overlaps extracted using the Tables function in the UCSC genome browser, except exon overlap which utilised Ensembl API. LCR overlap: CNV region coincides, at least partially, with Washington SegDup listing. DGV overlap: CNV region coincides, at least partially, with DGV variant listing. SNP overlap: CNV region contains dbSNP listing(s). Experimental Validation: Y indicates deletion or duplication confirmed by further analysis. SNP: No deletion or duplication but single nucleotide difference between test and reference samples detected. For Validation Method; qPCR: quantitative real time PCR, QMPSF: quantitative multiplex PCR of short fragments, PCR: standard PCR, Multiplex PCR: standard PCR incorporating an additional primer pair to control for amplification failure, Junction fragment analysis: PCR fragments spanning the rearrangement breakpoint were amplified by PCR and sequenced, FISH: fluorescent in situ hybridization, RT-PCR: reverse transcriptase PCR and sequence analysis of gene transcripts in RNA extracted from patient LCL.

See separate Excel file available online.

**Table S7:** Summary of CNV and in dels experimental validations

| CNV Size | Deletions         |                |                    |                             | Duplications      |                |                       |                             |
|----------|-------------------|----------------|--------------------|-----------------------------|-------------------|----------------|-----------------------|-----------------------------|
|          | Number of samples | Number of loci | Confirmed deletion | Underlying Sequence Variant | Number of samples | Number of loci | Confirmed duplication | Underlying sequence variant |
| <1kb     | 15                | 9              | 2/9                | 5/9                         | 2                 | 2              | 0/2                   | 1/2 <sup>a</sup>            |
| 1-10kb   | 20                | 12             | 11/12              | 1/12                        | 8                 | 2              | 2/2                   | 0/2                         |
| >10kb    | 3                 | 3              | 3/3                | 0/3                         | 26                | 24             | 24/24                 | 0/24                        |

CNVs were subdivided into 3 size categories and the contribution of genuine copy number changes and underlying sequence variants were assessed for deletions and duplications. <sup>a</sup> The unconfirmed duplication in this category may be due to altered hybridization caused by an adjacent and confirmed deletion. This table does not include data from samples which failed analysis quality control, such as those listed in Supplementary Table 5.

**Table S8:** Relationship between common SNP genotype and probe log2 ratio

| dbSNP ID  | Sequence variant         | Number of individuals |              | Mean log2 ratio  |              | Mean log2 difference | T      | Bonferroni adjusted p-value |
|-----------|--------------------------|-----------------------|--------------|------------------|--------------|----------------------|--------|-----------------------------|
|           |                          | Reference allele      | Other allele | Reference allele | Other allele |                      |        |                             |
| rs3829990 | PIR_c.681G>A p.Q227Q     | 129                   | 14           | -0.116           | -0.031       | -0.085               | -3.57  | 0.027 *                     |
| rs2071308 | MAGEB3_c.320G>A p.R107H  | 130                   | 35           | 0.03             | -0.041       | 0.071                | 2.76   | 0.117                       |
| rs4898    | TIMP1_c.372T>C p.F124F   | 117                   | 41           | -0.048           | -0.056       | 0.008                | 0.40   | 1                           |
| rs2073162 | TNMD_c.306G>A p.V102V    | 123                   | 50           | -0.02            | -0.09        | 0.07                 | 3.44   | 0.015*                      |
| rs3813933 | LONRF3_c.42T>C p.A14A    | 70                    | 6            | -0.014           | -0.053       | 0.039                | 0.99   | 1                           |
| rs5956583 | BIRC4_c.1268A>C p.Q423P  | 114                   | 45           | 0.034            | 0.039        | -0.005               | -0.28  | 1                           |
| rs4830219 | IGSF1_c.2556T>C p.Y852Y  | 123                   | 47           | 0.107            | 0.303        | -0.196               | -5.93  | 1.27e <sup>-06**</sup>      |
| rs1129093 | ZNF75_c.1434G>A p.T478T  | 104                   | 69           | -0.056           | 0.041        | -0.097               | -5.69  | 1.086 <sup>-06**</sup>      |
| rs5930931 | GPR112_c.1103C>Ap.P368H  | 65                    | 33           | -0.013           | 0.155        | -0.168               | -5.89  | 2.102e <sup>-06**</sup>     |
| rs1329546 | GPR112_c.7941C>Ap.T2647T | 95                    | 66           | 0.069            | 0.341        | -0.272               | -10.73 | <3.3e <sup>-15**</sup>      |
| rs5930942 | GPR112_c.9117G>Ap.T3039T | 75                    | 97           | 0.023            | 0.094        | -0.071               | -3.59  | 0.075*                      |
| rs1190736 | GPR101_c.370G>T p.V124L  | 69                    | 78           | -0.093           | 0.025        | -0.118               | -5.39  | 2.80e <sup>-07**</sup>      |
| rs764631  | FMR1NB_c.425C>Tp.A142V   | 156                   | 65           | -0.01            | -0.052       | 0.042                | 2.05   | 0.626                       |
| rs4833    | BGN_c.141G>Ap.S47S       | 86                    | 68           | -0.077           | -0.011       | -0.066               | -2.42  | 0.251                       |
| rs2269415 | ATP2B3_c.2592G>Cp.V864V  | 86                    | 87           | -0.21            | -0.132       | -0.078               | -2.76  | 0.097                       |

X chromosome coding SNPs with a minor allele frequency >0.35 were identified using HapMart. Analysis was restricted to SNPs targeted by 5 or more probes and where we had previously obtained genotype information by exon re-sequencing. The mean log2 ratios of the major and minor allele groups were compared using a two-tailed t-test. Bonferroni adjustment was applied to correct for multiple testing. \*\* significant at p<0.01 levels; \* significant at p<0.05

**Table S9:** CNV variants identified in the IGOLD cohort that have been reported previously to be predisposing alleles for ID.

| Gene(s)                             | ChrX location (Mb) | Genomic Extent | Type | Number of occurrences                               | Present in DGV?                             | Present in Decipher?          | Frequency in controls | Published reports                                                                                                                                                                                                                                                                     |
|-------------------------------------|--------------------|----------------|------|-----------------------------------------------------|---------------------------------------------|-------------------------------|-----------------------|---------------------------------------------------------------------------------------------------------------------------------------------------------------------------------------------------------------------------------------------------------------------------------------|
| <i>TSPAN7</i>                       | 38.37-38.52        | 145kb          | Dup  | 2; including family 359 ( <i>HUWE1</i> duplication) | Single report <sup>8</sup>                  | One report (male)             | nd                    | <sup>9</sup> ID, but found in conjunction with other pathogenic variants and/or not segregating fully with disease.<br><sup>10</sup> ASD, but no impact on expression in <sup>11</sup><br><sup>12</sup> ASD cases but suggest neutral polymorphism<br><sup>13</sup> SZ with normal IQ |
| <i>HDH1A, STS, VCX, VCX2, VCX3B</i> | 6.46-8.10          | 1.6Mb          | Dup  | 1                                                   | Yes, although unique duplication boundaries | Reported in males and females | 0/130                 | <sup>14</sup> suggest causative in male with severe MR (maternally inherited)                                                                                                                                                                                                         |
| <i>ASMT</i>                         | 1.68-1.71          | 23kb           | Dup  | 7 (plus 2 larger duplications)                      | Yes                                         | No                            | nd                    | <sup>12; 15</sup> ID: suggest association, but acknowledge PAR regions are poorly represented on array platforms                                                                                                                                                                      |
| <i>ZNF630, SSX6, SPACA5</i>         | 47.75-47.88        | 138kb          | Del  | 1                                                   | Yes                                         | No                            | 2/152                 | ID no significant association                                                                                                                                                                                                                                                         |
|                                     |                    |                | Dup  | 3                                                   | Yes                                         | No                            | 5/152                 |                                                                                                                                                                                                                                                                                       |

**Table S10:** Characteristics of sequenced breakpoints

| Family | Gene(s) within CNV          | CNV Type | START <sup>a</sup>      | END <sup>a</sup> | ADM-1 Estimated Start | ADM-1 Estimated End | Breakpoint microhomology | Repetitive Element overlap <sup>b</sup> |                                                   |
|--------|-----------------------------|----------|-------------------------|------------------|-----------------------|---------------------|--------------------------|-----------------------------------------|---------------------------------------------------|
|        |                             |          |                         |                  |                       |                     |                          | Breakpoint A                            | Breakpoint B                                      |
| 121    | <i>II1RAPL1</i>             | Del      | 28,922,932              | 29,253,959       | 28,923,176            | 29,253,472          | CC                       | -                                       | <b><i>MSTB</i> (LTR)</b>                          |
| 147    | <i>MAOA</i> and <i>MAOB</i> | Del      | 43,426,228              | 43,666,586       | 43,426,417            | 43,665,638          | AT                       | <b><i>AluY</i> (SINE)</b>               | <b><i>L1P2</i> (LINE)</b>                         |
| 398    | <i>SLC16A2</i>              | Del      | 73,666,964              | 73,669,304       | 73,666,845            | 73,668,835          | ATTTCTTTT                | <i>AluSg5</i> (SINE)                    | -                                                 |
| 399    | <i>SLC16A2</i>              | Del      | 73,552,449              | 73,567,609       | 73,553,102            | 73,567,239          | TT (+AGATT)              | <b><i>Charlie18a</i> (DNA)</b>          | <i>AluSz</i> (SINE) and <b><i>L1P4</i> (LINE)</b> |
| 506    | <i>CUL4B</i>                | Del      | 119,578,701             | 119,584,448      | 119,579,350           | 119,584,201         | AA                       | -                                       | <b><i>AluSp</i>(SINE)</b>                         |
| 540    | <i>PTCHD1</i>               | Del      | 23,239,008              | 23,329,210       | 23,238,828            | 23,327,945          | GTG                      | -                                       | <b><i>AluYc</i>(SINE)</b>                         |
| 126    | <i>NLGN4X</i>               | Del      | 6,027,992               | 6,037,317        | 6,028,255             | 6,036,586           | None                     | <b><i>MER9a3</i> (LTR)</b>              | <b><i>AluJr4</i> (SINE)</b>                       |
| 206    | <i>WDR13</i>                | Del      | 48,345,024              | 48,348,048       | 48,345,615            | 48,348,023          | C <sup>c</sup>           | -                                       | -                                                 |
| 110    | <i>AFF2</i>                 | Dup      | 147,547,319             | 147,757,141      | 147,548,998           | 147,757,224         | AC                       | -                                       | -                                                 |
| 317    | Several                     | Dup      | 119,698,636             | 125,699,533      | 119,698,440           | 125,699,839         | ATA                      | <b><i>MLT2B3</i>(LTR)</b>               | <b><i>L1MEc</i> (LINE)</b>                        |
| 505    | <i>POLA1</i> and <i>ARX</i> | Dup      | 24,902,835              | 24,943,900       | 24,902,734            | 24,940,400          | T                        | -                                       | <b><i>L1MD</i> (LINE)</b>                         |
| 463    | <i>GSPT2</i>                | Dup      | 51,469,871 <sup>d</sup> | 51,509,041       | 51,470,000            | 51,509,654          | GAA                      | (TG) <sub>n</sub> simple repeat         | <b><i>L1MD</i> (LINE)</b>                         |
| 494    | <i>FAAH2</i>                | Del      | not determined          |                  | 57,487,858            | 57,493,349          |                          |                                         |                                                   |
| 115    | <i>SLC9A6</i>               | Del      | not determined          |                  | 134,934,236           | 134,943,268         |                          |                                         |                                                   |
| 32     | <i>II1RAPL1</i>             | Del      | not determined          |                  | 28,939,863            | 29,497,216          |                          |                                         |                                                   |
| 376    | Several                     | Dup      | not determined          |                  | 18,985,933            | 22,751,175          |                          |                                         |                                                   |

For each breakpoint, two breakpoint regions (A and B) were defined as 150bp sequences centred at the breakpoint from proximal and distal reference sequence matches (identified by BLAT searching). <sup>a</sup> Co-ordinates exclude regions of microhomology: start corresponds to the last reference base before any microhomology and end to the first base after any microhomology; <sup>b</sup> Repetitive elements in bold type overlie the rearrangement breakpoint whereas those in regular type are contained within the 150bp breakpoint region but do not extend to the breakpoint itself; <sup>c</sup> The breakpoint in family 206 also contains a 12bp insertion presumed to result from serial replication slippage. <sup>d</sup> The telomeric boundary falls within a region of segmental duplication, and sequence analysis cannot distinguish the two possible reference matches. The breakpoint position reported here corresponds to the duplcon position closest to the array estimate of duplication extent

**Table S11:** Comparison of genomic features in breakpoint regions and a simulated control dataset

|                                          | <b>Breakpoint Regions<br/>(n=24)</b> | <b>Simulated Dataset<br/>(n=500)</b> | <b>p-value</b> |
|------------------------------------------|--------------------------------------|--------------------------------------|----------------|
| <b>LCR overlap</b>                       | 1                                    | 30                                   | 1              |
| <b>Repetitive element overlap</b>        |                                      |                                      |                |
| none                                     | 9                                    | 184                                  | 1              |
| LTR                                      | 3                                    | 64                                   | 1              |
| LINE                                     | 4                                    | 160                                  | 0.174          |
| SINE                                     | 5                                    | 48                                   | 0.204          |
| DNA element                              | 1                                    | 10                                   | 0.406          |
| Other                                    | 1                                    | 15                                   | 0.533          |
| Multiple elements within<br>150bp window | 1                                    | 19                                   | 0.615          |
| <b>Non-B DNA structures</b>              |                                      |                                      |                |
| G-quartet                                | 12                                   | 130                                  | 0.017          |
| Z-DNA                                    | 2                                    | 3                                    | 0.019          |

Features of the proximal and distal 150bp breakpoint reference sequences for each of the 12 sequenced rearrangements were compared to a control set of 500 sequences, each 150bp in length, generated by random sampling of the X chromosome, following exclusion of sequence gaps and centromeric regions. LCRs were identified using the UCSC genome browser (for LCRs: genomicSuperDups track). Repetitive Elements were identified using RepeatMasker. G-quartet and Z-DNA were detected using QGRS mapper and Z-hunt online respectively. Statistical significance assessed using chi-square contingency test.

## References in Supplementary Materials

1. Froyen G, Corbett M, Vandewalle J, Jarvela I, Lawrence O, Meldrum C, Bauters M, Govaerts K, Vandeleur L, Van Esch H, et al. (2008) Submicroscopic duplications of the hydroxysteroid dehydrogenase HSD17B10 and the E3 ubiquitin ligase HUWE1 are associated with mental retardation. *Am J Hum Genet* 82:432-443
2. Friez MJ, Jones JR, Clarkson K, Lubs H, Abuelo D, Bier JA, Pai S, Simensen R, Williams C, Giampietro PF, et al. (2006) Recurrent infections, hypotonia, and mental retardation caused by duplication of MECP2 and adjacent region in Xq28. *Pediatrics* 118:e1687-1695
3. Bauters M, Van Esch H, Friez MJ, Boespflug-Tanguy O, Zenker M, Vianna-Morgante AM, Rosenberg C, Ignatius J, Raynaud M, Hollanders K, et al. (2008) Nonrecurrent MECP2 duplications mediated by genomic architecture-driven DNA breaks and break-induced replication repair. *Genome Res* 18:847-858
4. Clayton-Smith J, Walters S, Hobson E, Burkitt-Wright E, Smith R, Toutain A, Amiel J, Lyonnet S, Mansour S, Fitzpatrick D, et al. (2009) Xq28 duplication presenting with intestinal and bladder dysfunction and a distinctive facial appearance. *Eur J Hum Genet* 17:434-443
5. Thode A, Partington MW, Yip MY, Chapman C, Richardson VF, Turner G (1988) A new syndrome with mental retardation, short stature and an Xq duplication. *Am J Med Genet* 30:239-250
6. Bejerano G, Pheasant M, Makunin I, Stephen S, Kent WJ, Mattick JS, Haussler D (2004) Ultraconserved elements in the human genome. *Science* 304:1321-1325
7. Siepel A, Bejerano G, Pedersen JS, Hinrichs AS, Hou M, Rosenbloom K, Clawson H, Spieth J, Hillier LW, Richards S, et al. (2005) Evolutionarily conserved elements in vertebrate, insect, worm, and yeast genomes. *Genome Res* 15:1034-1050
8. Zogopoulos G, Ha KC, Naqib F, Moore S, Kim H, Montpetit A, Robidoux F, Laflamme P, Cotterchio M, Greenwood C, et al. (2007) Germ-line DNA copy number variation frequencies in a large North American population. *Hum Genet* 122:345-353
9. Froyen G, Van Esch H, Bauters M, Hollanders K, Frints SG, Vermeesch JR, Devriendt K, Fryns JP, Marynen P (2007) Detection of genomic copy number changes in patients with idiopathic mental retardation by high-resolution X-array-CGH: important role for increased gene dosage of XLMR genes. *Hum Mutat* 28:1034-1042
10. Marshall CR, Noor A, Vincent JB, Lionel AC, Feuk L, Skaug J, Shago M, Moessner R, Pinto D, Ren Y, et al. (2008) Structural variation of chromosomes in autism spectrum disorder. *Am J Hum Genet* 82:477-488
11. Noor A, Gianakopoulos PJ, Fernandez B, Marshall CR, Szatmari P, Roberts W, Scherer SW, Vincent JB (2009) Copy number variation analysis and sequencing of the X-linked mental retardation gene TSPAN7/TM4SF2 in patients with autism spectrum disorder. *Psychiatr Genet* 19:154-155
12. Cai G, Edelmann L, Goldsmith JE, Cohen N, Nakamine A, Reichert JG, Hoffman EJ, Zurawiecki DM, Silverman JM, Hollander E, et al. (2008) Multiplex ligation-dependent probe amplification for genetic screening in autism spectrum disorders: efficient identification of known microduplications and identification of a novel microduplication in ASMT. *BMC Med Genomics* 1:50
13. Guilmatre A, Dubourg C, Mosca AL, Legallic S, Goldenberg A, Drouin-Garraud V, Layet V, Rosier A, Briault S, Bonnet-Brilhault F, et al. (2009) Recurrent rearrangements in synaptic and neurodevelopmental genes and shared biologic pathways in schizophrenia, autism, and mental retardation. *Arch Gen Psychiatry* 66:947-956
14. Wagenstaller J, Spranger S, Lorenz-Depiereux B, Kazmierczak B, Nathrath M, Wahl D, Heye B, Glaser D, Liebscher V, Meitinger T, et al. (2007) Copy-number variations measured by single-nucleotide-polymorphism oligonucleotide arrays in patients with mental retardation. *Am J Hum Genet* 81:768-779



15. Lugtenberg D, Zangrande-Vieira L, Kirchhoff M, Whibley AC, Oudakker AR, Kjaergaard S, Vianna-Morgante AM, Ruiter TKM, Jehee FS, Ullmann R, et al. (2010) Recurrent deletion of ZNF630 at Xp11.23 is not associated with mental retardation. *Am J Med Genet A* In Press
